# Supplementary material for: Improvement of Cognitive Function by Fermented Panax ginseng C.A. Meyer Berries Extracts in an AF64A-Induced Memory Deficit Model
Source: MDPI journal article supplement (doi:10.3390/nu15153389), 2023-07-30
Supplement: s1 [file s1]

Supplementary Table S1. Primer sequences used for PCR analysis in this study

| A. Primer Sequences used for human NSCs |                        |                         |               |
|-----------------------------------------|------------------------|-------------------------|---------------|
| Gene                                    | Primer sequences       |                         | Accession No. |
|                                         | Forward                | Reverse                 |               |
| CHT1                                    | TGCAGTATCTCTGCCCTGTG   | TGTGATTCGCATAACCCAAA    | NM_021815     |
| ChAT                                    | TCATTAATTTCCGCCGTCTC   | GAGTCCCGGTTGGTGGAGT     | NM_020986     |
| VACHT                                   | GTGCGCCATGTCTCAGTCTA   | CATAGAGCAGGTTGGCCAGT    | NM_003055     |
| M1ACHR                                  | AGCTCCCCAAATACAGTC     | TTGCAGAGTGCGTAGCAG      | NM_000738     |
| nAChR $\alpha$ 5                        | TTTCTTCACACGCTTCCCAAA  | TCACGGACATCATTTTCCTTCA  | NM_000745     |
| nAChR $\beta$ 2                         | GCCTGCGCCTGCGGCGACGCC  | CCTCACTCACGCTCTGGTCAT   | NG_008027     |
| BDNF                                    | GGATGAGGACCAGAAAGT     | AGCAGAAAGAGAAGAGGAG     | NM_170734     |
| NGF                                     | CCATCCCATCTTCCACAG     | CTCTCCCAACACCATCAC      | NM_002506     |
| GAPDH                                   | AAGAAGGTGGTGAAGCAG     | GTCAAAGGTGGAGGAGTG      | NM_001289746  |
| B. Primer sequences used for mice brain |                        |                         |               |
| CHT1                                    | TTCCAGATTCAGGCAGTAGACG | GGGAGGGAAACTCCTATCTTGT  | NM_022025     |
| ChAT                                    | TGGGTCTCTGAATACTGGCTGA | GGGCTAGAGTTGACTGGCAGG   | NM_009891     |
| VACHT                                   | CCCTTTTGATGGCTGTGA     | GGGCTAGGGTACTCATTAGA    | NM_021712     |
| M1ACHR                                  | TGACAGGCAACCTGCTGGTGCT | AATCATCAGAGCTGCCCTGCGG  | NM_007698     |
| nAChR $\alpha$ 5                        | GAGCAAGGGGAACCGGAC     | TCTTACGAACCCACGGCG      | NM_176844     |
| nAChR $\beta$ 2                         | CTCCTTTGGCTGTGTTTCAGG  | AGGAGACTTCGTACATGCCG    | NM_009602     |
| BDNF                                    | TACTTCGGTTGCATGAAGGCG  | GTCAGACCTCTCGAACCTGCC   | NM_007540     |
| NGF                                     | TGATCGGCGTACAGGCAGA    | GAGGGCTGTGTCAAGGGAAT    | NM_013609     |
| GAPDH                                   | CGTGCCGCCTGGAGAAACC    | TGGAAGAGTGGGAGTTGCTGTTG | NM_008084     |

Supplementary Table S2. List of antibodies used in the current study

| Epitope           | Company            | Cat. No.  | Dilution | 2° Ab (IgG) |
|-------------------|--------------------|-----------|----------|-------------|
| CHT<br>(42 kDa)   | Abcam              | ab154186  | 1:1000   | Rb          |
| ChAT<br>(82 kDa)  | Abcam              | ab178850  | 1:1000   | Rb          |
| VACHT<br>(56 kDa) | Synaptic<br>system | #139103   | 1:500    | Rb          |
| BDNF<br>(14 kDa)  | Abcam              | ab226843  | 1:1000   | Rb          |
| NGF<br>(13 kDa)   | Abcam              | ab6199    | 1:1000   | Rb          |
| GFAP<br>(55 kDa)  | Abcam              | Ab7260    | 1:10000  | Rb          |
| Abeta<br>(4 kDa)  | MyBiosource        | MBS632680 | 1:500    | Ms          |
| Actin<br>(43 kDa) | Cell Signal        | #5125     | 1:1000   | Rb          |

Supplementary Table S3. Contents of ginsenoside in pre- and post-fermented GBE (mg/g)

| Peak No. | Ginsenoside | Pre         | Post        | Changes<br>(average, $n=3$ ) |
|----------|-------------|-------------|-------------|------------------------------|
| 1        | Rg1         | 5.79±0.11   | -           | -5.79                        |
| 2        | Re          | 84.72±0.28  | 1.31±0.09   | -83.40                       |
| 3        | Rb1         | 11.34±0.23  | -           | -11.34                       |
| 4        | Rc          | 12.95±0.12  | 5.21±0.19   | -7.74                        |
| 5        | Rb2         | 20.2±0.17   | 2.39±0.1    | -17.81                       |
| 6        | F1          | 1.17±0.05   | -           | -1.17                        |
| 7        | Rd          | 42.45±0.06  | 14.21±0.2   | -28.24                       |
| 8        | F4          | 4.32±0.1    | 58.47±0.35  | +54.15                       |
| 9        | F2          | 0.61±0.03   | 5.36±0.12   | +4.75                        |
| 10       | Rg3(S)      | 1.22±0.06   | 26.34±0.1   | +25.12                       |
| 11       | Rg3(R)      | 0.18±0.01   | 17.79±0.07  | +17.61                       |
| 12       | Rk1         | 1.78±0.06   | 10.12±0.08  | +8.34                        |
| 13       | Rg5         | 0.64±0.03   | 12.33±0.04  | +11.69                       |
| 14       | Rh2         | -           | 0.23±0.02   | +0.23                        |
|          | Total       | 187.36±1.15 | 153.75±1.23 | -33.61                       |

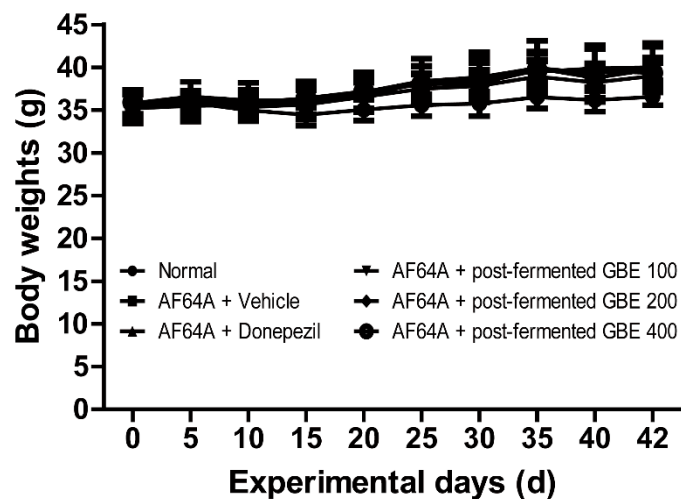

**Supplementary Figure S1.** The body weights during experimental period. The animals were orally administrated with donepezil (2 mg/kg) and GBE (100, 200, and 400 mg/kg) during 6 weeks. n=7 in each group. Data are presented as mean  $\pm$  SD.
